# Supplementary figures and images for: Experimental Verification of the Identity of Variant-Specific Surface Proteins in Giardia lamblia Trophozoites
Source: PubMed Central journal article supplement — mBio. 2013 May 21;4(3):e00321-13. doi: 10.1128/mBio.00321-13 (PMC3656445; doi:10.1128/mbio.00321-13), 2013-05-21

Figure S2

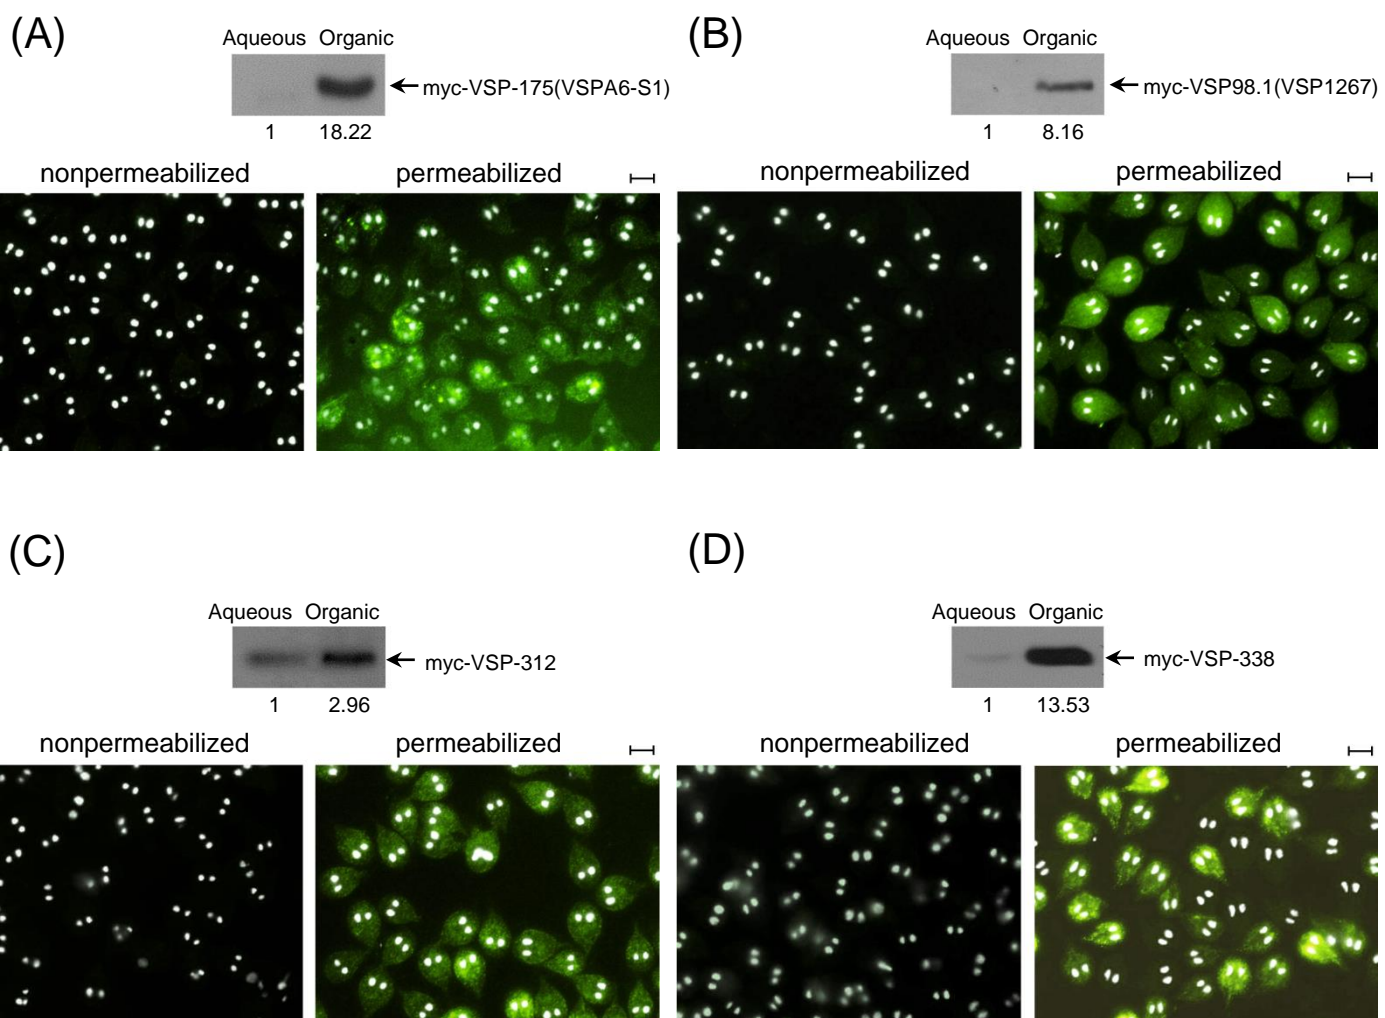

Supplement: mbo003131529sf02.pdf [file mbo003131529sf02.pdf]
